# Supplementary material
Source: Research Square preprint supplement (doi:10.21203/rs.3.rs-9765725/v1)
Supplement: Supplementary file 1 [file 2e8b97c5c6e084ea2382a13c.docx]

| **Appendix 1. First Round Voting Stage Statements** |
| --- |
| 1. **Characteristics and types of Distal metabolic and bariatric surgeries (DMBS)**   **(Note: Most of the following statements lack high-level evidence, including limb length choice, and therefore require expert consensus)** |
| 1. DMBS aim to stimulate enteroendocrine cells and produce a significant metabolic effect, regardless of weight loss |
| 1. DMBS aim to induce greater hypoabsorption and result in significant and sustained weight loss |
| 1. DMBS should not be labeled as malabsorptive procedures |
| 1. Routine measurement of the total small bowel length is recommended in all DMBS |
| 1. Measurement of the small bowel should be performed from distal to proximal, starting at the ileocecal valve, to ensure an adequate common channel length |
| 1. A minimum biliopancreatic limb length of 150 cm is required to define a DMBS |
| 1. A minimum biliopancreatic limb length of 200 cm is required to define a DMBS |
| 1. At least 40% of the total small bowel length as the biliopancreatic limb is required to define a DMBS |
| 1. At least 50% of the total small bowel length as the biliopancreatic limb is required to define a DMBS |
| 1. At least 60% of the total small bowel length as the biliopancreatic limb is required to define a DMBS |
| 1. A maximum of 300 cm of common channel is required to define a DMBS, irrespective of the total small bowel length |
| 1. A maximum of 350 cm of common channel is required to define a DMBS, irrespective of the total small bowel length |
| 1. A maximum of 400 cm of common channel is required to define a DMBS, irrespective of the total small bowel length |
| 1. Fixed common channel limb lengths are preferable to use instead of tailored limb lengths |
| 1. Tailored common channel limb lengths are preferable to use instead of fixed common channel limb lengths |
| 1. The terms common channel and efferent limb may be used interchangeably in single-anastomosis procedures |
| 1. It is preferable to use the term efferent limb instead of common channel in those single-anastomosis procedures |
| 1. It is preferable to use the term common channel instead of efferent limb in those single-anastomosis procedures |
| 1. Conventional Roux-en-Y Gastric Bypass (BP limb < 100 cm, Alimentary limb < 150 cm) is NOT considered a DMBS |
| 1. Long Alimentary Limb Roux-en-Y Gastric Bypass (Alimentary limb > 150 cm) with short Biliopancreatic limb (< 100 cm) is considered a DMBS |
| 1. Long Biliopancreatic Limb Roux-en-Y Gastric Bypass (BP limb > 150 cm) irrespective of the Alimentary limb length is considered a DMBS |
| 1. Standardized One-Anastomosis Gastric Bypass (OAGB) (BP Limb ≤ 200 cm) is considered a DMBS |
| 1. Standardized One-Anastomosis Gastric Bypass (OAGB) (BP Limb at least 200 cm) is considered a DMBS |
| 1. Tailored One-Anastomosis Gastric Bypass (OAGB) (BP Limb ≥40%) is considered a DMBS |
| 1. Tailored One-Anastomosis Gastric Bypass (OAGB) (BP Limb ≥50%) is considered a DMBS |
| 1. Tailored One-Anastomosis Gastric Bypass (OAGB) (BP Limb ≥60%) is considered a DMBS |
| 1. Single Anastomosis Duodeno-Jejunal bypass (SADJ-S) (BP Limb ≤ 200 cm) + Sleeve Gastrectomy is considered a DMBS |
| 1. Single Anastomois Duodeno-Ileal bypass (SADI-S) (Common channel ≤ 350 cm) + Sleeve Gastrectomy is considered a DMBS |
| 1. Biliopancreatic diversion with duodenal switch (BPD-DS) is considered a DMBS, irrespective of the common channel length |
| 1. Single Anastomosis Sleeve-Jejunal Transit Bipartition (SASJ) (BP Limb ≤ 200 cm) is considered a DMBS |
| 1. Single Anastomosis Sleeve-Ileal Transit Bipartition (SASI) (Common channel ≤ 350 cm) is considered a DMBS |
| 1. Jejunal Transit Bipartition (Roux-en-Y configuration) (BP Limb ≤ 200 cm) + Sleeve Gastrectomy is considered a DMBS |
| 1. Ileal Transit Bipartition (Roux-en-Y configuration) (Common channel ≤ 350 cm) + Sleeve Gastrectomy is considered a DMBS |
| 1. Ileal interposition + Sleeve Gastrectomy is considered a DMBS, irrespective of the common channel length |
| 1. Ileal interposition without Sleeve Gastrectomy is considered a DMBS, irrespective of the common channel length |
| 1. For DMBS Roux en Y procedures (Distal RYGB, BPD/DS) a total alimentary limb length (TALL) of at least 300 cm is recommended |
| 1. For DMBS Roux en Y procedures (Distal RYGB, BPD/DS) a total alimentary limb length (TALL) of at least 350 cm is recommended |
| 1. For DMBS Roux en Y procedures (Distal RYGB, BPD/DS) a total alimentary limb length (TALL) of at least 400 cm is recommended |
| 1. In Transit Bipartition (TB) procedures, all limbs correspond to alimentary limbs, regardless of the percentage of food exposure |
| 1. For SG+TB a total common limb of at least 200 cm is recommended |
| 1. For SG+TB a total common limb of at least 250 cm is recommended |
| 1. For SG+TB a total common limb of at least 300 cm is recommended |
| 1. For Single Anastomosis procedures (OAGB, SADI-S, SADJ-S, SASJ, SASI) a common channel of at least 250 cm is recommended |
| 1. For Single Anastomosis procedures (OAGB, SADI-S, SADJ-S, SASJ, SASI) a common channel of at least 300 cm is recommended |
| 1. For Single Anastomosis procedures (OAGB, SADI-S, SADJ-S, SASJ, SASI) a common channel of at least 350 cm is recommended |
| 1. In Pylorus sparing procedures shorter than 300 cm of common channel lengths can be used |
| 1. In Pylorus sparing procedures shorter than 250 cm of common channel lengths can be used |
| 1. **Indications and selection of the patients** |
| 1. Robust preoperative work up (blood tests, ruling out liver disease, complete cardiopulmonary evaluation) should be performed before performing a DMBS |
| 1. Preoperative multidisciplinary evaluation (psychological and nutritional) should be ensured before a DMBS |
| 1. The patient must understand and be aware of the risks and benefits of a DMBS prior undergoing the surgery |
| 1. DMBS are suitable as primary MBS for patients with a BMI between 35 and 39.9 kg/m2 without associated metabolic comorbidities (Type 2 Diabetes, Hyperlipidemia…) |
| 1. DMBS are suitable as primary MBS for patients with a BMI between 35 and 39.9 kg/m2 with associated metabolic comorbidities (Type 2 Diabetes, Hyperlipidemia…) |
| 1. DMBS are suitable as primary MBS for patients with a BMI between 40 and 49.9 kg/m2 without associated metabolic comorbidities (Type 2 Diabetes, Hyperlipidemia…) |
| 1. DMBS are suitable as primary MBS for patients with a BMI between 40 and 49.9 kg/m2 with associated metabolic comorbidities (Type 2 Diabetes, Hyperlipidemia…) |
| 1. DMBS are suitable as primary MBS for patients with a BMI > 50 without associated metabolic comorbidities (Type 2 Diabetes, Hyperlipidemia…) |
| 1. DMBS are suitable as primary MBS for patients with a BMI > 50 with associated metabolic comorbidities (Type 2 Diabetes, Hyperlipidemia…) |
| 1. DMBS are suitable as primary MBS for patients with a BMI > 60 without associated metabolic comorbidities (Type 2 Diabetes, Hyperlipidemia…) |
| 1. DMBS are suitable as primary MBS for patients with a BMI > 60 with associated metabolic comorbidities (Type 2 Diabetes, Hyperlipidemia…) |
| 1. DMBS are a viable option for revision due to suboptimal clinical response or recurrent weight gain following restrictive procedures (LAGB, SG) |
| 1. DMBS are a viable option for revision due to suboptimal clinical response or recurrent weight gain following Roux-en-Y Gastric Bypass (RYGB) |
| 1. DMBS are a viable option for revision due to de novo type 2 Diabetes Mellitus or relapse following restrictive procedures (LAGB, SG) |
| 1. DMBS are a viable option for revision due to de novo type 2 Diabetes Mellitus or relapse following RYGB |
| 1. DMBS should NOT be performed in patients with liver cirrhosis |
| 1. DMBS should NOT be performed in patients with end-stage kidney disease |
| 1. DMBS could be performed in patients with end-stage congestive heart failure |
| 1. DMBS could be performed in patients with end-stage pulmonary disease |
| 1. DMBS should NOT be performed in patients with previous solid organ transplant (heart, lung, kidney, liver) |
| 1. DMBS should NOT be performed in patients with inflammatory bowel disease |
| 1. Pylorus Sparing DMBS with Sleeve Gastrectomy (BPD/DS, SADI-S, SADJ-S) are NOT recommended in patients with gastroesophageal reflux disease (GERD) |
| 1. Gastro-enteral derivative procedures (SASI, SASJ, SG+TB) are suitable in patients with gastroesophageal reflux disease (GERD) |
| 1. Procedures that include sleeve gastrectomy (BPD/DS, SADI-S, SADJ-S, SASI, SASJ, SG+TB) are NOT recommended in patients with gastroesophageal reflux disease (GERD) |
| 1. **Postoperative follow-up** |
| 1. DMBS should be performed exclusively by experienced surgeons in specialized centers 2. Efforts should be made to ensure patient follow-up 3. Efforts should be made to ensure patient follow-up at least 1 year. 4. Efforts should be made to ensure patient follow-up at least 2 years 5. Efforts should be made to ensure patient follow-up at least 3 to 5 years 6. Efforts should be made to ensure patient lifetime follow-up 7. Postoperative follow-up must involve a multidisciplinary MBS team with specific expertise in DMBS, comprising a psychologist, dietitian, internal medicine specialist |
| 1. DMBS are associated with a higher incidence of micronutrient and vitamin deficiencies compared to other bariatric and metabolic procedures |
| 1. DMBS are associated with a higher incidence of hypoalbuminemia and malnutrition compared to other bariatric and metabolic procedures |
| 1. Patients should be informed of the increased risk of developing micro- and macronutrient deficiencies in the mid- and long-term |
| 1. Patients should be informed of the increased risk of developing chronic diarrhea |
| 1. Mineral and vitamin supplementation should be higher compared to restrictive or mixed procedures |
| 1. Bipartitional procedures (SG+TB, SASI, SASJ) may require lower mineral and vitamin supplementation compared to other DMBS, due to the preservation of the duodenum and proximal jejunum |
| 1. A high protein diet should be ensured in patients undergoing DMBS |
| 1. Routine blood tests are recommended at least every 3 months following any DMBS |
| 1. Routine blood tests are recommended at least every 6 months following any DMBS |
| 1. Routine blood tests are recommended at least every 12 months following any DMBS |
| 1. A high-protein diet and increased mineral and vitamin supplementation is the first-line approach when malnutrition or hypoproteinemia is identified following a DMBS |
| 1. Increasing the total alimentary limb (TALL) (common channel + alimentary/Roux limb) length is an appropriate treatment for patients with malnutrition or severe mineral or vitamin deficiencies are refractory to dietary adjustments following a DMBS |
| 1. Dismantling or transection of the gastroileal anastomosis is an appropriate treatment for patients with malnutrition or severe mineral or vitamin deficiencies who have undergone bipartitional procedures (SG+TB, SASI, SASJ) |
| 1. Endoscopic suture closure of the gastroileal anastomosis is an appropriate treatment for patients with malnutrition or severe mineral or vitamin deficiencies who have undergone bipartitional procedures (SG+TB, SASI, SASJ) |
| 1. DMBS can achieve adequate results in the control of T2DM |
| 1. DMBS can achieve adequate results in the control of blood pressure |
| 1. DMBS can achieve adequate results in the control of lipid levels |
| 1. DMBS can achieve adequate results in the control of obstructive sleep apnea |
| 1. DMBS can achieve adequate weight loss outcomes at short-term follow-up |
| 1. DMBS can achieve adequate weight loss outcomes at medium-term follow-up |
